# Supplementary material for: Importance of the αC-helix in the cyclic nucleotide binding domain for the stable channel regulation and function of cyclic nucleotide gated ion channels in Arabidopsis
Source: PubMed Central journal article supplement — J Exp Bot. 2010 Apr 8;61(9):2383–93. doi: 10.1093/jxb/erq072 (PMC2877894; doi:10.1093/jxb/erq072), 2010-04-08
Supplement: erq072_1.pdf [file erq072_1.pdf]

# Importance of the $\alpha$ C-helix in the Cyclic Nucleotide Binding Domain for the Stable Channel Regulation and Function of Cyclic Nucleotide Gated Ion Channels in Arabidopsis

Kimberley Chin, Wolfgang Moeder, Huda Abdel-Hamid, Dea Shahinas, Deepali Gupta, and Keiko Yoshioka

Supplemental Figure 1

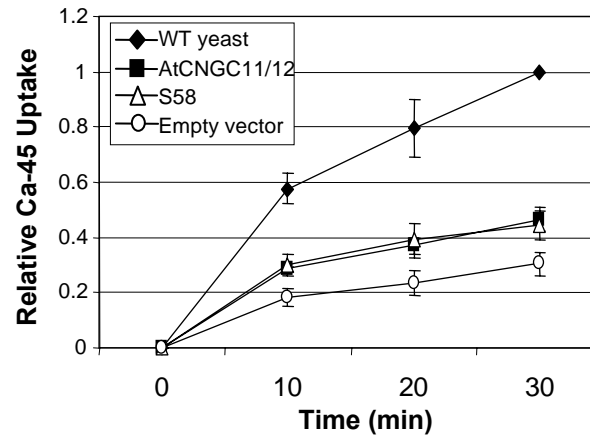

## Importance of the $\alpha$ C-helix in the Cyclic Nucleotide Binding Domain for the Stable Channel Regulation and Function of Cyclic Nucleotide Gated Ion Channels in *Arabidopsis*

Kimberley Chin, Wolfgang Moeder, Huda Abdel-Hamid, Dea Shahinas, Deepali Gupta, and Keiko Yoshioka

Supplemental table 1. Interaction phenotype with *H. arabidopsidis* isolate Emwa1<sup>a</sup>

| Genotype           | Total No. of Plants | No. of Resistant Plants | No. of Susceptible Plants |
|--------------------|---------------------|-------------------------|---------------------------|
| Ws-wt              | 33                  | 3                       | 30                        |
| Col-wt             | 22                  | 22                      | 0                         |
| <i>cpr22/CPR22</i> | 26                  | 0                       | 26                        |
| S58                | 32                  | 0                       | 32                        |

a Based on formation of sporangiophores; Resistance, no formation; Susceptible, formation.

Supplemental table 2. Segregation analysis of the *cpr22* phenotype

| Plant Line <sup>a</sup>                                 | Total No. | Morphological Phenotype |              |        | Hypothesis | $\chi^2$ <sup>c</sup> | P    |
|---------------------------------------------------------|-----------|-------------------------|--------------|--------|------------|-----------------------|------|
|                                                         |           | Wt                      | <i>cpr22</i> | Lethal |            |                       |      |
| <i>cpr22/CPR22</i>                                      | 92        | 25                      | 43           | 23     | 1:2:1      | 0.41                  | 0.81 |
| S58 x <i>cpr22/cpr22</i> (B <sub>1</sub> ) <sup>d</sup> | 5         | 0                       | 5            | 0      | 0:1:0      |                       |      |
| B <sub>2</sub> <sup>e</sup>                             | 92        | 19                      | 47           | 24     | 1:2:1      | 0.73                  | 0.69 |

a S58 is the pollen accepting plant.

b Both *cpr22* and S58 are semi-dominant.

c two degrees of freedom

d Backcross first generation of S58 and *cpr22* homozygous plants

e Backcross second generation of S58 and *cpr22* homozygous plants.
